# Supplementary material for: An ethnobotanical study on the medicinal herb practices of the gelao ethnic minority in North Guizhou, China: an exploration of traditional knowledge
Source: Front Pharmacol. 2023 Aug 31;14:1217599. doi: 10.3389/fphar.2023.1217599 (PMC10500598; doi:10.3389/fphar.2023.1217599)
Supplement: Supplementary file 1 [file Table2.xlsx]

## Sheet: Table 2 Quantitative evaluation
Table 2 Quantitative evaluation index of medicinal herbs in the study area
Local name in Chinese	FQI	AI	FUI	PUI	MFI	CEI	DSI	CFSI
Ai	59	4	5	5	4	4	5	4720
Bai Gu Ding	53	4	5	5	4	3	5	3180
Shui Bo He	50	4	5	5	4	3	5	3000
Zhe Er Gen	48	4	5	5	3	4	5	2880
Xia Ku Cao	44	4	5	5	4	3	5	2640
Ke Ma Ye	52	4	5	5	3	3	5	2340
Ling Zhi	50	3	5	5	3	4	5	2250
Qing Hao	46	3	5	5	3	4	5	2070
Hai Dai	44	4	5	5	3	3	5	1980
Ye Ge Shao	50	4	5	4	3	3	5	1800
Jiang	50	4	5	4	3	3	5	1800
Shuang Hua	47	4	5	3	3	4	5	1692
She Ren Cao	38	4	5	5	2	4	5	1520
Lao Hu Jiang	42	4	5	3	3	4	5	1512
Yi Mi	52	4	5	3	3	3	5	1404
Jia Bai He	51	4	5	3	3	3	5	1377
Chuan Jiao	47	4	5	3	3	3	5	1269
Guo Shang Ye	41	2	5	5	3	4	5	1230
Bai Xiang	40	4	4	3	4	3	5	1152
Suan Tang Gan	36	4	5	4	2	4	5	1152
Mao Gen	45	4	5	4	2	3	5	1080
Se Mi Bao	40	4	5	3	3	3	5	1080
Han Lian Cao	47	3	5	5	2	3	5	1057.5
Zhong Ling Cao	42	2	5	4	3	4	5	1008
Ju Hua	56	2	5	3	3	4	5	1008
Xiao Hui Xiang	37	4	5	3	3	3	5	999
Pao Shen	40	2	5	4	3	4	5	960
San Cha Gu	48	2	5	5	2	4	5	960
Ba Zhua Jin Long	49	3	5	4	2	4	4	940.8
Lu Mao Gen	39	4	5	4	2	3	5	936
Nu Zhen Zi	39	4	5	3	2	4	5	936
Ma Chi Cai	31	4	5	5	2	3	5	930
Xue Jian Chou	36	4	5	4	2	4	4	921.6
Mai Nie	33	4	5	3	3	3	5	891
Pa Yan Jiang	46	3	5	4	2	4	4	883.2
Sang Bai Pi	43	3	5	3	3	3	5	870.75
Xiao Ku Yao	36	2	5	4	3	4	5	864
Feng Tang Guan	48	3	5	3	2	4	5	864
Bai Guo	32	4	5	3	3	3	5	864
Mai Men Dong	36	4	4	3	3	3	5	777.6
Hong Guo	43	2	5	3	3	4	5	774
Tian Ma	48	2	5	4	2	4	5	768
He Shou Wu	29	4	5	4	2	4	4	742.4
Jin Li Zhi	27	4	5	3	3	3	5	729
Luo Bo Zi	40	4	5	3	2	3	5	720
Deng Cao	38	3	5	5	2	3	4	684
Pi Pa	42	3	3	3	3	4	5	680.4
Ye Jiao Teng	33	4	5	4	2	3	4	633.6
Ci Huang Qin	43	3	5	3	2	4	4	619.2
Ye Tie Sao Ba	38	4	5	5	1	4	4	608
Tian Dong	36	3	4	3	3	3	5	583.2
Jiu Li Guang	47	4	5	5	1	4	3	564
San Pi Feng	39	4	3	5	2	3	4	561.6
Zhu Jie Cao	23	4	5	5	2	3	4	552
Shi Zi Cao	45	3	5	5	1	4	4	540
Tu Ren Shen	23	3	5	5	2	3	5	517.5
Fei Dao Jian	43	3	5	5	1	4	4	516
Xiao Si Kuai Wa	32	2	5	5	2	4	4	512
Ma Bian Sao	42	3	5	5	1	4	4	504
Shi Zi Tang	23	4	4	3	3	3	5	496.8
Lao Hu Er	27	3	5	5	2	3	4	486
Xing He	27	2	5	3	3	4	5	486
Ci Li	30	3	4	3	3	3	5	486
Wu Pi Feng	39	4	5	5	1	3	4	468
Dui Ye Cao	39	3	5	5	1	4	4	468
Fang Zhang	26	4	5	3	2	3	5	468
Di Xing Su	19	3	4	5	2	4	5	456
Fo Shou Gan	19	2	5	3	4	4	5	456
Rou Gui	33	3	5	3	2	3	5	445.5
Jia Lu Dou	49	2	5	3	2	3	5	441
Ku Gua Lou	48	2	5	3	2	3	5	432
Lin Lan	36	1	5	4	3	4	5	432
Yu Mai Xu	29	4	4	3	2	3	5	417.6
Ban Jiu Wo	34	4	5	5	1	3	4	408
Shui Yang Mei/Tou Yun Yao	34	3	5	5	1	4	4	408
Wu Zhu Yu	34	2	5	3	2	4	5	408
Guan Jie	42	3	5	4	1	4	4	403.2
Daoi Gou Cao	42	4	5	4	1	3	4	403.2
Jiu Cai Gen	22	4	2	5	3	3	5	396
Zhi Jia Hua	27	4	3	5	2	3	4	388.8
Du Zhong	48	2	5	2	2	4	5	384
Ku Cha Ye	40	2	4	3	2	4	5	384
Ba Yue Zha	35	3	4	3	2	3	5	378
E Ji Po	25	2	5	5	2	3	5	375
Jian Cao	38	4	5	4	1	4	3	364.8
Jin Gang Dou Teng	41	3	4	3	2	3	4	354.24
Bian Zhu	27	2	5	4	2	4	4	345.6
Shan Hu Jiao	32	3	4	3	2	3	5	345.6
Po Fu Cao	33	2	4	4	2	4	4	337.92
Chai Hu	23	3	4	4	2	3	5	331.2
Zhu Ti Cha	32	2	5	3	2	4	4	307.2
Pai Feng Teng	32	4	4	5	1	3	4	307.2
Tu Dang Gui	38	2	5	5	1	4	4	304
Xiang Hua Yan Dou Teng	31	2	5	4	2	3	4	297.6
Wu Jia Pi	37	2	5	2	2	4	5	296
Huang Hua Cai	27	4	2	3	3	3	5	291.6
Hong Dou Shan	36	3	5	3	2	3	3	291.6
Tu Da Huang	39	4	5	4	1	3	3	280.8
Shan Wu Gui	38	3	5	4	2	3	2	273.6
Ma Yu Guo	41	4	5	4	1	4	2	262.4
Shui Qin Cai	21	4	4	5	1	3	5	252
Di Lao Shu	13	4	5	4	2	3	4	249.6
Shan Zao Jia	46	2	5	3	2	3	3	248.4
San Leng Cao	34	4	5	3	1	4	3	244.8
Qian Nian Lao Shu Shi	24	4	5	4	1	3	4	230.4
Pu Jian	24	4	5	4	1	3	4	230.4
Yang Nai Guo	21	3	4	3	2	3	5	226.8
Ye Han Su	21	3	4	3	2	3	5	226.8
Lao She Bao Gu	35	4	5	4	1	4	2	224
Ci Huang Bai	41	3	5	3	1	3	4	221.4
Lao Jun Xu	34	2	5	4	1	4	4	217.6
Ji Shi Teng	34	2	5	4	1	4	4	217.6
Qi Ye Yi Zhi Hua	37	2	3	3	2	4	4	213.12
Luo Yang Hua	13	2	5	5	2	4	4	208
He Ma	13	4	4	4	2	3	4	199.68
Ye Di Gua	18	3	4	3	2	3	5	194.4
Zhu Xin Cao	32	2	5	5	1	3	4	192
Chou Jin Cao	24	2	5	5	1	4	4	192
Hu Cang Zi	37	3	5	4	1	4	2	177.6
Chou Hao	26	3	5	5	1	3	3	175.5
Di Luo Bo	24	3	3	4	2	2	5	172.8
Yun Mu Xiang	36	2	5	4	1	3	4	172.8
Yang Xu Cao	26	2	4	5	1	4	4	166.4
Jin Guo Lan	32	3	5	4	1	4	2	153.6
Jing Feng Cao	24	2	5	4	1	4	4	153.6
Hai Jiao	14	4	2	3	3	3	5	151.2
Shan Shen	30	2	5	4	1	4	3	144
Bai Bei	11	2	5	4	2	4	4	140.8
Guan Yin Cao	13	2	3	5	3	3	4	140.4
Shi Liu Ke	39	4	5	2	1	3	3	140.4
Ren Shen	36	4	4	4	1	3	2	138.24
Ban Jie Lan	27	4	4	4	1	4	2	138.24
Huang Bo	43	2	5	2	1	4	4	137.6
Jiu Zhuan Xiang	19	2	3	5	2	3	4	136.8
Ji Jiao Hua	19	2	5	3	2	3	4	136.8
Hong Teng	34	2	4	4	1	3	4	130.56
Huang Gua	12	4	3	3	3	2	5	129.6
Man Tian Xing	24	2	2	4	2	4	4	122.88
Ji Jiao Cao	17	3	4	4	1	3	5	122.4
Hei Long Gu	19	2	5	4	1	4	4	121.6
Xiao Qing Cao	20	2	5	5	1	3	4	120
Wu Gong Cao	24	2	5	4	1	3	4	115.2
Du Jiao Lian	20	3	5	3	1	3	4	108
Ge Shan Qiu	22	2	5	4	1	4	3	105.6
Jia Ma	12	3	3	4	2	3	4	103.68
Wei Lian	32	1	5	4	1	4	4	102.4
Mo Li Hua	17	4	4	3	1	3	4	97.92
Qing Mu Xiang	16	2	5	5	1	3	4	96
Shan Jiang	39	1	5	4	1	3	4	93.6
Ba Jiao Feng	42	2	2	3	2	3	3	90.72
Shi Hu Jiao	28	3	4	3	1	3	3	90.72
Cao Hao	18	4	3	5	1	2	4	86.4
Shui La Zhu	24	3	5	2	1	3	4	86.4
Jue Tai	19	3	3	5	1	2	5	85.5
Mu Fu Rong	19	2	3	3	2	3	4	82.08
Yi Zhi Jian	21	2	4	4	1	3	4	80.64
Lei Gong Teng	32	2	5	4	1	3	2	76.8
Ye Hua Jiao Gen	8	3	5	4	1	4	4	76.8
Shui Yang Liu	20	2	3	5	1	3	4	72
Ku Jin Pen	25	2	3	4	1	3	4	72
Da Chuan Xiong	14	1	4	4	2	4	4	71.68
San Yue Pao	22	2	3	4	1	3	4	63.36
Mao Zhui Zi Cao	18	4	3	3	1	3	3	58.32
Yang Tang Li	6	4	5	4	1	3	4	57.6
Yun Shi	25	2	3	4	1	3	3	54
Jin Ying Zi	14	2	4	3	1	3	5	50.4
Lao Ying Cha	17	2	4	3	1	3	4	48.96
Lao Guan Hua	15	1	5	4	1	4	4	48
La Mei Hua	6	2	3	3	2	4	5	43.2
Suan Gan	9	2	5	4	1	3	4	43.2
Xue Dang Gui	14	2	4	3	1	3	4	40.32
She Bu Jian	10	2	5	3	1	3	4	36
She Tou Wang	11	1	5	5	1	3	4	33
Jin Wa Er	9	3	3	5	1	2	4	32.4
Yang Jin Hua	11	2	3	3	2	4	2	31.68
Chou Shan Yang	14	2	3	3	1	3	4	30.24
Yang Ti Jia	19	2	2	3	1	3	4	27.36
Yi Zhi Jian	6	2	1	5	2	4	5	24
Shan Zong	8	4	3	2	1	3	4	23.04
Cao Wu	27	1	5	4	1	4	1	21.6
San Jiao Feng	10	3	2	3	1	3	4	21.6
Ya Zi Hua	7	2	4	3	1	3	4	20.16
Niu Er Duo	10	1	3	5	1	3	4	18
Xie Jian Dou qiao	22	2	2	2	1	2	5	17.6
Shi Diao Lan	8	2	3	3	1	2	4	11.52
Ye Nan Gua	12	2	2	3	1	3	2	8.64
Cao Ma	9	2	1	3	1	3	1	1.62
