# Supplementary material for: An ethnobotanical study on the medicinal herb practices of the gelao ethnic minority in North Guizhou, China: an exploration of traditional knowledge
Source: Front Pharmacol. 2023 Aug 31;14:1217599. doi: 10.3389/fphar.2023.1217599 (PMC10500598; doi:10.3389/fphar.2023.1217599)
Supplement: Supplementary file 2 [file Table1.xlsx]

## Sheet: Table 1 The inventory of medici
Table 1 The inventory of medicinal plants traditionally used by Gelao people
Family name	Latin name	Local name in Chinese	Name in Gelao	Part used	Life form	Processing method	Medicinal use	Preparation and uses	Voucher number
Alangiaceae	Alangium chinense (Lour.) Harms	Ba Jiao Feng	/	Roots	Tree/Shrub	Fresh product/Dried	Paralysis / Rheumatism	Decoct in water and mix with warm water for soaking or washing	W-2022-0847
Stemonaceae	Stemona japonica (Blume) Miq.	Po Fu Cao	xə55wu53tsε55	Roots	Herb	Dried after removing the pith	Asthma/Cough	Decoct in water and take orally	W-2022-0978
Liliaceae	Hemerocallis citrina Baroni	Huang Hua Cai	/	flowers	Herb	Fresh product/Dried	Clearing heat and dampness	Decoct in water and take orally	W-2022-0846
	Asparagus cochinchinensis (Lour.) Merr.	Tian Dong	tɕia55tiuo13i31	Roots	Herb	Dried after steaming	Tracheitis	Stew and eat/ Decoct in water and take orally	W-2022-0979
	Smilax glabra Roxb.	Jin Gang Dou Teng	tɕia55tu33nio33	rhizomes	Shrub	Dried	Skin disease	Decoct in water and take orally	W-2022-0845
	Ophiopogon japonicus (Thunb.) Ker Gawl.	Mai Men Dong	miaη53taη31	Roots	Herb	Dried	Lung disease/Snake bite	Pound into paste and take sublingually /Decoct in water and take orally	W-2022-0980
	Polygonatum sibiricum Redouté	Lao Hu Jiang	mu33po55sə33kε55	RhizomesRhizomes	Herb	Dried after steaming	Centipede bite	Chew and apply externally	W-2022-0977
	Reineckea carnea (Andrews) Kunth	Guan Yin Cao	tɕia55pu53kε53	Whole plants	Herb	Dried	Cold	Decoct in water and take orally	W-2022-0976
	Allium tuberosum Rottler ex Spreng.	Jiu Cai Gen	si53pe53ɕi55i55	Roots/ Bulbs	Herb	Fresh product/Dried	Anal fistula	Soak in wine and take orally	W-2022-0804
	Lilium brownii var. viridulum Baker	Jia Bai He	ka33nin55	Rhizomes	Herb	Dried	Dry burn disease	Soak in water and take orally	W-2022-0975
	Paris polyphylla Sm.	Qi Ye Yi Zhi Hua	mu53o53sə55pi55	Rhizomes	Herb	Dried	Clearing heat and detoxifying/Swelling and pain relief	Decoct in water and take orally	W-2022-0844
Cupressaceae	Platycladus orientalis (L.) Franco	Bai Xiang	mu33tso53ie33	Leaves	Tree	Shade-dried	Nosebleed	Decoct in water and take orally	W-2022-0801
Valerianaceae	Valeriana jatamansi Jones ex Roxb.	Jiu Zhuan Xiang	ka55tɕi31ma55xoη53	Rhizomes	Herb	Dried	Stomach disease	Decoct in water and take orally	W-2022-0981
Plantaginaceae	Plantago depressa Willd.	Ke Ma Ye	tɕi55koη35tɕa55	Whole plants	Herb	Dried	Nephritis	Decoct in water and take orally	W-2022-0803
Labiatae	Mentha arvensis L.	Shui Bo He	/	Whole plants	Herb	Fresh product/Dried	Loss of appetite	Decoct in water and take orally	W-2022-0982
	Prunella vulgaris L.	Xia Ku Cao	/	Whole plants	Herb	Dried	Anti-tumor/Lowering blood pressure	Decoct in water and take orally	W-2022-0802
Euphorbiaceae	Euphorbia sikkimensis Boiss．	Shui Yang Liu	nə31kə31kə55xən31	RootsRoots	Herb	Dried	Water urgency disease	Decoct in water and take orally	W-2022-0974
	Glochidion puberum (L.) Hutch.	Ye Nan Gua	xoη53kuo33ʑuo13	Roots/ /Leaves	Shrub	Dried	Infantile malnutrition,	Decoct in water and take orally	W-2022-0848
	Ricinus communis L.	Cao Ma	/	Seeds	Herb	Dried	Carbuncle	Apply externally	W-2022-0983
Juncaceae	Juncus effusus L.	Deng Cao	təu31kəu53tɕia55	Whole plants	Herb	Dried	Dizziness/Blurred vision/Limb weakness	Decoct in water and take orally	W-2022-0972
Leguminosae	Callerya dielsiana (Harms ex Diels) L.K.Phan ex Z.Wei & Pedley	Xiang Hua Yan Dou Teng	iao53kai55pia53	Vines	Liana	Dried	Thromboangiitis obliterans	Decoct in water and take orally	W-2022-0973
	Biancaea decapetala (Roth) O.Deg.	Yun Shi	tɕia55mu55kao53	Roots	Herb	Dried	Headache	Decoct in water and take orally	W-2022-0849
	Bauhinia brachycarpa Wall. ex Benth.	Yang Ti Jia	le31fe55tu31lame13	Roots/Leaves	Shrub	Dried	Nocturnal enuresis in children	Decoct in water and take orally	W-2022-0843
	Sophora flavescens Aiton	Shan Shen	kaη33koη55	Roots	Herb	Dried	Hemorrhoids	Soak in wine and take orally	W-2022-0851
	Senna tora (L.) Roxb.	Jia Lu Dou	/	Seeds	Herb	Dried	Abdominal distension	Decoct in water and take orally	W-2022-0902
	Canavalia gladiata (Jacq.) DC.	Xie Jian Dou qiao	/	Shell	Liana	Dried	Indigestion	Decoct in water and take orally	W-2022-0850
	Pueraria montana var. lobata (Willd.) Maesen & S.M.Almeida ex Sanjappa & Predeep	Ye Ge Shao	/	Roots	Liana	Dried	Typhoid fever	Decoct in water and take orally	W-2022-0986
	Pachyrhizus erosus (L.) Urb.	Di Luo Bo	/	Roots	Liana	Fresh product	Clearing heat and relieving summer heat/ strengthening stomach and digesting food	Eat raw/Stir-fry	W-2022-0805
	Gleditsia sinensis Lam.	Shan Zao Jia	sao53kao53	Fruit/Seeds	Tree	Dried	Removing blood stasis and opening orifices	Soak in water and take orally	W-2022-0902
Eucommiaceae	Eucommia ulmoides Oliv.	Du Zhong	loη31se55	Bark	Tree	Dried	Lowering blood sugar/blood pressure/blood lipid	Decoct in water and take orally	W-2022-0971
Polyporaceae	Ganoderma lucidum (Curtis) P. Karst.	Ling Zhi	/	Sporocarp	Algae	Fresh product	Cardiovascular disease	Soak in water and take orally/Decoct in water and take orally	W-2022-0901
Menispermaceae	Stephania cephalantha Hayata	Shan Wu Gui	tɕe13tao55lao31k55	Roots	Herb	Dried	Balanitis	Apply externally	W-2022-0842
	Paratinospora sagittata (Oliv.) Wei Wang	Jin Guo Lan	tɕia55ku53wu53	Roots	Herb	Dried	Stomach disease	Swallow with warm water	W-2022-0984
Balsaminaceae	Impatiens balsamina L.	Zhi Jia Hua	ka55oη53pe53ke55	Whole plants	Herb	Fresh product	Onychomycosis/hand and foot skin disease	Apply externally	W-2022-0806
Laminariaceae	Laminariajaponica Aresch.	Hai Dai	/	Thallus	Algae	Dried	Goiter	Stew and eat after boiling	W-2022-0970
Lygodiaceae	Lygodium japonicum (Thunb.) Sw.	Ban Jiu Wo	xoη55sa33tsy53	sporangium	Liana	Dried	Eye disease	Decoct in water and take orally	W-2022-0852
Gramineae	Zea mays L.	Yu Mai Xu	mi13tɕi33tɕi55	Style	Herb	Dried	Nosebleed	Decoct in water and take orally	W-2022-0985
	Imperata cylindrica (L.) Raeusch.	Mao Gen	ɕi31i31mu31ke55	Rhizomes	Herb	Dried	Nephritis/edema	Decoct in water and take orally	W-2022-0807
	Coix lacryma-jobi L.	Yi Mi	ni31maη53tso53	Kernel	Herb	Dried	Edema/snake bite	Decoct in water and take orally	W-2022-0841
	Phragmites australis (Cav.) Trin. ex Steud.	Lu Mao Gen	kaη53ɕi53i55	Roots	Herb	Fresh product	Nosebleed	Decoct in water and take orally	W-2022-0969
	Hordeum vulgare L.	Mai Nie	/	bud	Herb	Dried	Indigestion	Decoct in water and take orally	W-2022-0900
	Dactylis glomerata L.	Ji Jiao Cao	/	Whole plants	Herb	Fresh product/Dried	unknown	Soak in water and take orally/Decoct in water and take orally	W-2022-0968
Taxaceae	Taxus chinensis (Pilg.) Rehder	Hong Dou Shan	/	Roots/stem /Leaves/Fruits	Tree	Fresh product	Cancer	Soak in wine and take orally	W-2022-0970
Piperaceae	Piper wallichii (Miq.) Hand.-Mazz.	Shi Hu Jiao	tsao33tse13poη53loη55	Whole plants	Liana	Dried	Rheumatic pain/lumbar and leg pain	Decoct in water and take orally/Soak in wine and take orally	W-2022-0840
Elaeagnaceae	Elaeagnus pungens Thunb.	Yang Nai Guo	/	Fruits	Shrub	Fresh product	Enteritis/dysentery/anorexia	Soak in wine and take orally	W-2022-0899
Cucurbitaceae	Trichosanthes kirilowii Maxim.	Ku Gua Lou	xə33kuo53tsoη53	Luffa shell	Liana	Shade-dried	Edema	Decoct in water and take orally	W-2022-0891
	Hemsleya sphaerocarpa Kuang & A.M.Lu	Ku Jin Pen	tɕia55moη53kuo53	Roots	Liana	Dried	Suppuration	Chew and apply externally	W-2022-0967
	Cucurbita moschata Duchesne	Huang Gua	xə53ku53tsao53	Roots	Herb	Shade-dried切块	Back pain	Soak in wine and take orally	W-2022-0853
	Gynostemma pentaphyllum (Thunb.) Makino	Xiao Ku Yao	/	Whole plants	Liana	Made into tea after drying	Qi deficiency	Decoct in water and take orally	W-2022-0898
	Momordica charantia L.	Jin Li Zhi	/	Fruits	Herb	Fresh product/Dried	Excessive internal heat	Decoct in water and take orally	W-2022-0904
Drynariaceae	Davallia trichomanoides Blume	Pa Yan Jiang	ke55tɕio55suo53kε35	Rhizomes	Fern	Dried	Kidney deficiency	Decoct in water and take orally	W-2022-0839
Saxifragaceae	Saxifraga stolonifera Curtis	Lao Hu Er	moη53puo55tso53	Whole plants	Herb	Dried	Skin ulceration	Boil into ointment and apply externally	W-2022-0964
Zingiberaceae	Zingiber officinale Roscoe	Jiang	sℽ55kε55	Rhizomes	Herb	Dried	Cold	Decoct in water and take orally	W-2022-0892
	Hedychium coronarium J.Koenig	Ye Han Su	fe55tu31sə53to55	Roots/stem/Fruits	Herb	Dried	Lack of milk	Stew and eat after boiling	W-2022-0965
Chloranthaceae	Chloranthus holostegius (Hand.-Mazz.) C.Pei & San	Xiao Si Kuai Wa	pu55pie53o53	Roots	Shrub	Fresh product/Dried	Traumatic injury	Apply externally	W-2022-0893
Malvaceae	Hibiscus moscheutos L.	Mu Fu Rong	/	flowers /Leaves	Tree	Dried	snake bite	Apply externally	W-2022-0894
Campanulaceae	Codonopsis pilosula subsp. tangshen (Oliv.) D.Y.Hong	Zhong Ling Cao	/	Roots	Liana	Dried	snake bite	Decoct in water and take orally	W-2022-0809
	Lobelia chinensis Lour.	She Ren Cao	toη53mie13tsao31	Whole plants	Herb	Fresh product/Dried	snake bite	Apply externally	W-2022-0808
	Adenophora stricta Miq.	Pao Shen	pao53poη13ηia55	Roots	Herb	Dried	cough	Decoct in water and take orally	W-2022-0966
Compositae	Artemisia capillaris Thunb.	Qing Hao	/	Whole plants	Herb	Fresh product/Dried	Child fever	Chew and apply externally	W-2022-0895
	Cirsium spicatum Matsum.	E Ji Po	loη31mog13tɕi53lε31	Whole plants	Herb	Fresh product/Dried	Hematemesis	Decoct in water and take orally	W-2022-0897
	Taraxacum mongolicum Hand.-Mazz.	Bai Gu Ding	tɕia55pu31kai31	Whole plants	Herb	Dried	Acute gastritis/gum swelling/excessive internal heat	Decoct in water and take orally/Apply externally	W-2022-0896
	Senecio scandens Buch.-Ham. ex D.Don	Jiu Li Guang	əu53tsa35sə53	Whole plants	Herb	Shade-dried	Eye disease	Decoct in water and wash eyes	W-2022-0962
	Dolomiaea costus (Falc.) Kasana & AKPandey	Yun Mu Xiang	kia55tu53loη53	Roots	Herb	Dried	Chronic nephritis	Decoct in water and take orally	W-2022-0854
	Artemisia rupestris L.	Wu Gong Cao	tsr53mu53ηe53	Whole plants	Herb	Dried	centipede bite	Soak in wine and apply externally	W-2022-0905
	Ainsliaea glabra Hemsl.	Zhu Xin Cao	ka33nin55	Whole plants	Herb	Fresh product/Dried	cough	Decoct in water and take orally	W-2022-0963
	Solidago decurrens Lour.	She Tou Wang	tsǝ33mo53pε55xε53	Whole plants	Herb	Dried	Liver and stomach disharmony	Decoct in water and take orally	W-2022-0855
	Carpesium abrotanoides L.	Jin Wa Er	ti31kε55ʑuo13	Whole plants	Herb	Dried	Otitis media	Crush and squeeze juice and apply externally	W-2022-0906
	Eschenbachia blinii (H.Lév.) Brouillet	Cao Hao	mu53lin33koη55	Whole plants	Herb	Shade-dried	Fever/burn	Chew and apply externally	W-2022-0810
	Xanthium strumarium L.	Hu Cang Zi	mu53tsε31nin31	Fruits	Herb	Dried	headache	Fry until charred and grind into powder and take with yellow wine	W-2022-0890
	Bidens pilosa L.	Mao Zhui Zi Cao	mie31pie53pe55	Whole plants	Herb	Dried	Diarrhea	Decoct in water and soak feet	W-2022-0960
	Atractylodes macrocephala Koidz.	Shan Jiang	wu53xao53	Rhizomes	Herb	Shade-dried	Stomach disease	Swallow with warm water	W-2022-0907
	Eclipta prostrata (L.) L.	Han Lian Cao	/	Whole plants	Herb	Dried/Shade-dried	Diarrhea	Decoct in water and take orally	W-2022-0856
	Artemisia argyi H.Lév. & Vaniot	Ai	/	Whole plants	Herb	Dried after crushing	Warming menstruation and stopping bleeding/dispelling cold and relieving pain	Make moxa sticks for moxibustion	W-2022-0961
	Chrysanthemum morifolium (Ramat.) Hemsl.	Ju Hua	/	Bud	Herb	Fresh product/Dried	Anti-inflammatory and removing fire/clearing liver and improving vision	Decoct in water and take orally/Soak in water and take orally	W-2022-0959
	Symphyotrichum subulatum (Michx.) G.L.Nesom	Chai Hu	/	Rhizomes	Herb	Dried	Carbuncle/eczema	Decoct in water and take orally	W-2022-0857
Pteridiaceae	Pteridium aquilinum (L.) Kuhn	Jue Tai	/	Roots	Herb	Dried	unknown	Stir-fry	W-2022-0889
Acanthaceae	Rostellularia mollissima (Nees) Nees	Xiao Qing Cao	/	Whole plants	Herb	Fresh product/Dried	Clearing heat and detoxifying/diuretic and reducing swelling	Decoct in water and take orally	W-2022-0908
	Justicia adhatoda L.	Ya Zi Hua	/	Whole plants	Shrub	Fresh product	Clearing heat and cooling blood/anti-inflammatory and analgesic	Crush and squeeze juice and apply externally	W-2022-0858
Gesneriaceae	Lysionotus pauciflorus Maxim.	Shi Diao Lan	tɕo53ta31tɕaη53	Whole plants	Shrub	Fresh product/Dried	Infantile malnutrition	Apply externally	W-2022-0958
	Bergenia purpurascens (Hook.f. & Thomson) Engl.	Niu Er Duo	tɕio53noη31wu53	Whole plants	Herb	Dried	Kidney deficiency	Stew and eat after boiling	W-2022-0859
Calycanthacerae	Chimonanthus praecox (L.) Link	La Mei Hua	/	Flowers	Shrub	Dried	Heatstroke	Brew tea	W-2022-0888
Orchidaceae	Bletilla striata (Thunb.) Rchb.f.	Zhu Ti Cha	kai55wu33	Bulbs	Herb	Dried after steaming	Lymph node enlargement	Pound and mix with wine and boil and apply externally	W-2022-0838
	Dendrobium nobile Lindl.	Lin Lan	/	Stem	Herb	Dried	Promoting fluid production and benefiting stomach/clearing heat and nourishing yin	Brew tea	W-2022-0909
	Coelogyne chinensis (Lindl.) Rchb.f.	Guo Shang Ye	taη31ti31	Bulbs/Whole plants	Herb	Fresh product/ Dried after steaming	Lung heat cough/hemoptysis	Decoct in water and take orally	W-2022-0887
	Gastrodia elata Blume	Tian Ma	pε35ε53	Roots	Herb	Dried	Anti-epilepsy/anti-convulsion	Decoct in water and take orally	W-2022-0910
Chenopodiaceae	Dysphania ambrosioides (L.) Mosyakin & Clemants	Chou Hao	/	Spikelet	Herb	Shade-dried	Eczema/rheumatic pain	Apply externally/Decoct in water and take orally	W-2022-0957
Polygonaceae	Reynoutria multiflora (Thunb.) Moldenke	Ye Jiao Teng	k’ia55sε33	Roots	Herb	Dried	Treating yin deficiency	Decoct in water and take orally	W-2022-0811
	Rheum palmatum L.	Tu Da Huang	pie35mo53nia31	Roots	Herb	Dried	Nephritis	Decoct in water and take orally	W-2022-0954
	Reynoutria japonica Houtt.	Suan Tang Gan	pa55tɕi55pe55	Rhizomes	Herb	Dried	Scald/Burn	Grind finely and mix with vegetable oil and apply externally	W-2022-0837
	Polygonum aviculare L.	Ye Tie Sao Ba	/	Whole plants	Herb	Shade-dried	Stones/Nephritis/Dysentery	Decoct in water and take orally	W-2022-0955
	Reynoutria multiflora (Thunb.) Moldenke	He Shou Wu	k’ia55sε33	Roots	Herb	Dried	Calming the mind/blackening the beard and hair	Decoct in water and take orally	W-2022-0860
Dryopteridaceae	Cyrtomium fortunei J.Sm.	Guan Jie	tɕia55pu31miao31	Rhizomes	Herb	Dried	Influenza	Decoct in water and take orally	W-2022-0885
Gentianaceae	Ajuga decumbens Thunb.	Chou Jin Cao	k’a55dk’aη33kǝ55ɕi33	Whole plants	Herb	Dried	Roundworm/oral inflammation	Grind into powder and blow into nostrils	W-2022-0956
Asclepiadaceae	Periploca forrestii Schltr.	Hei Long Gu	ta33taη13naη53nie55	Whole plants	Shrub	Dried	Rheumatic numbness	Decoct in water and take orally	W-2022-0836
	Vincetoxicum atratum (Bunge) C.Morren & Decne.	Yi Zhi Jian	tɕia55mu33iao31	Roots	Herb	Dried	Stomach pain	Swallow with warm water	W-2022-0911
	Marsdenia tenacissima (Roxb.) Moon	Jin Ying Zi	/	Roots	Liana	Fresh product/Dried	Equine spleen wind	Wash rice water and pound and squeeze juice and take orally	W-2022-0885
	Vincetoxicum atratum (Bunge) C.Morren & Decne.	Lao Jun Xu	wu55ka31	Rhizomes	Herb	Dried	Lymphatic tuberculosis	Decoct in water and take orally and apply externally	W-2022-0953
Verbenaceae	Verbena officinalis L.	Ma Bian Sao	tɕia55nio55	Whole plants	Herb	Dried	Hemorrhoids	Decoct in water and bathe	W-2022-0912
Portulacaceae	Talinum paniculatum (Jacq.) Gaertn.	Tu Ren Shen	/	Roots/Leaves	Herb	Fresh product/Dried	Promoting lactation/nourishing	Decoct in water and take orally	W-2022-0812
	Portulaca oleracea L.	Ma Chi Cai	ka55mu53pe33lin55	Whole plants	Herb	Shade-dried	Pulmonary tuberculosis	Stew and eat after boiling	W-2022-0952
Aristolochiaceae	Aristolochia debilis Siebold & Zucc.	Qing Mu Xiang	k’ia55tiaη33	Whole plants	Liana	Dried	Stomach pain	Swallow with warm water	W-2022-0815
Ranunculaceae	Semiaquilegia adoxoides (DC.) Makino	Qian Nian Lao Shu Shi	sai33pi55ko53no53	Roots	Herb	Dried	Stomach pain/Hemorrhoids	Wash rice water and pound and squeeze juice and take orally	W-2022-0949
	Coptis chinensis Franch.	Wei Lian	pe53fu55	Rhizomes	Herb	Dried	Acute gastritis/hemorrhoids	Decoct in water and take orally	W-2022-0880
	Pulsatilla chinensis (Bunge) Regel	Lao Guan Hua	/	Roots	Herb	Dried	Hepatitis with jaundice	Decoct in water and take orally	W-2022-0835
	Aconitum carmichaelii Debeaux	Cao Wu	mi13ta3kon55	Roots	Herb	Dried	Vaginal trichomoniasis	Decoct in water and bathe	W-2022-0950
Actinidiaceae	Actinidia chinensis Planch.	Yang Tang Li	/	Roots	Liana	Fresh product/Dried	Hepatitis/edema	Soak in wine and take orally	W-2022-0913
Lardizabalaceae	Sargentodoxa cuneata (Oliv.) Rehder & E.H.Wilson	Hong Teng	me31kǝ55xǝn31tsao31	Stem	Liana	Dried	Rheumatoid arthritis/infertility	Decoct in water and take orally	W-2022-0861
	Holboellia latifolia Wall.	Ba Yue Zha	/	Fruit	Liana	Fresh product	Hernia/uterine prolapse	Eat raw	W-2022-0951
Oleaceae	Ligustrum robustum (Roxb.) Blume	Ku Cha Ye	tɕia33kaη55tsǝ55	Leaves	Tree	Dried	Hypertension	Decoct in water and take orally	W-2022-0883
	Ligustrum lucidum W.T.Aiton	Nu Zhen Zi	/	Fruits	Tree	Dried	Yin deficiency	Decoct in water and take orally	W-2022-0813
	Jasminum sambac (L.) Aiton	Mo Li Hua	/	Flowers /Leaves	Shrub	Fresh product/Dried	Clearing heat and detoxifying	Soak in water and take orally	W-2022-0884
Ophioglossaceae	Ophioglossum vulgatum L.	Yi Zhi Jian	sǝ53mo53pi53	Whole plants	Herb	Dried	Toothache	Soak in wine and take orally Apply externally	W-2022-0879
Aceraceae	Acer buergerianum Miq.	San Jiao Feng	/	Roots bark/branch /Leaves	Tree	Dried	Rheumatic numbness	Decoct in water and take orally	W-2022-0914
Rubiaceae	Rubia cordifolia L.	Xue Jian Chou	ka55ti55liaη55	Rhizomes	Liana	Dried	Abnormal leucorrhea	Decoct in water and take orally	W-2022-0834
	Paederia foetida L.	Ji Shi Teng	ku55kai55xǝ31	Whole plants	Shrub	Dried	Fracture	Soak in wine and take orally	W-2022-0882
	Serissa japonica (Thunb.) Thunb. Nov. Gen.	Man Tian Xing	ᶇi31ta31lai31	Whole plants	Shrub	Dried	Traumatic injury	Soak in wine and take orally	W-2022-0947
	Scleromitrion diffusum (Willd.) R.J.Wang	Yang Xu Cao	ηu55wu33tsa33pe55	Whole plants	Herb	Dried/Shade-dried	Snake bite	Chew and apply externally	W-2022-0814
Rosaceae	Potentilla indica (Andrews) Th.Wolf	San Pi Feng	mie31moη55ηuo55	Whole plants	Herb	Fresh product/Dried	Traumatic injury/ fever	Decoct in water and take orally	W-2022-0816
	Eriobotrya japonica (Thunb.) Lindl.	Se Mi Bao	ti33mu55pi55pa53	Flowers/Leaves	Tree	Dried	Cough	Decoct in water and take orally	W-2022-0915
	Potentilla sundaica (Blume) W.Theob.	Wu Pi Feng	/	Whole plants	Herb	Dried	Chronic cough/whooping cough in children/worm and snake bite	Honey-fried and decoct in water and take orally	W-2022-0948
	Prunus sibirica L.	Xing He	tsio33mo33ɕin33	Kernel	Tree	Dried	Chronic bronchitis	Decoct in water and take orally	W-2022-0862
	Rosa laevigata Michx.	Feng Tang Guan	ka33tse55	Roots/Fruit	Shrub	Dried	Hair loss/impotence	Decoct in water and take orally	W-2022-0881
	Crataegus pinnatifida Bunge	Hong Guo	taη33pia55	Fruit	Tree	Dried	Diarrhea	Decoct in water and take orally	W-2022-0833
	Rubus rosifolius Sm.	San Yue Pao	tao13suo55ɕi33	Roots	Shrub	Dried	Irregular menstruation	Decoct in water and take orally	W-2022-0945
	Geum aleppicum Jacq.	Shui Yang Mei/Tou Yun Yao	/	Whole plants	Herb	Dried/Shade-dried	Headache/dizziness	Decoct in water and take orally	W-2022-0832
	Eriobotrya japonica (Thunb.) Lindl.	Pi Pa	ti33mu55pi55pa53	Bud /Fruits/Leaves	Tree	Dried	Cough	Decoct in water and take orally	W-2022-0944
	Rosa roxburghii Tratt.	Ci Li	me13kai55ɕi53ni55	Fruits	Shrub	Fresh product/Dried	Indigestion	Eat raw/Soak in wine and take orally	W-2022-0877
Solanaceae	Datura stramonium L.	Yang Jin Hua	me35nie55kε55xe33	Flowers	Herb	Shade-dried	Toothache	Apply externally	W-2022-0916
	Capsicum annuum L.	Hai Jiao	/	Fruits	Herb	Dried	Rheumatic numbness	Eat raw	W-2022-0878
	Solanum lyratum Thunb.	Pai Feng Teng	/	Whole plants	Liana	Fresh product/Dried	Fracture	Decoct in water and take orally	W-2022-0943
Caprifoliaceae	Lonicera japonica Thunb.	Shuang Hua	ɕia33xaη55	Stem/Leaves/ Flowers	Liana	Shade-dried	Influenza	Decoct in water and take orally/Brew tea	W-2022-0946
Saururaceae	Houttuynia cordata Thunb.	Zhe Er Gen	ɕi31i55	Leaves	Herb	Fresh product	Detoxifying and clearing heat/dispelling carbuncle and draining pus	Decoct in water and take orally	W-2022-0817
Umbelliferae	Conioselinum anthriscoides (H.Boissieu) Pimenov & Kljuykov	Da Chuan Xiong	xε55ɕioη53	Whole plants	Herb	Dried	Traumatic injury	Decoct in water and take orally	W-2022-0831
	Foeniculum vulgare Mill.	Xiao Hui Xiang	fε55xaη53	Roots	Herb	Dried	Nephritis	Decoct in water and take orally	W-2022-0942
	Oenanthe javanica (Blume) DC.	Shui Qin Cai	loη31mo31	Whole plants	Herb	Dried	Nephritis	Decoct in water and take orally	W-2022-0830
	Hydrocotyle sibthorpioides Lam.	Di Xing Su	tɕia55puo35ie31	Whole plants	Herb	Shade-dried	Newborn choking on water	Decoct in water and take orally	W-2022-0875
	Pimpinella candolleana Wight et Arn.	Tu Dang Gui	/	Whole plants	Herb	Fresh product	Diarrhea	Swallow with warm water	W-2022-0940
	Ostericum citriodorum (Hance) RHshan & CQYuan	Ge Shan Qiu	/	Whole plants	Herb	Dried	Cough/ Angina	Decoct in water and take orally	W-2022-0829
Moraceae	Morus indica L.	Sang Bai Pi	ka55saη53wu53	Root bark /Leaves	Tree	Dried	Eye pain	Decoct in water and take orally	W-2022-0938
	Ficus tikoua Bureau	Ye Di Gua	/	Roots	Liana	Dried	Cough/Hepatitis with jaundice	Soak in water and take orally	W-2022-0818
Cyperaceae	Cyperus rotundus L.	San Leng Cao	tɕia55miε55nie55	Tuber	Herb	Dried	Stomach pain	Decoct in water and take orally	W-2022-0937
Phytolaccaceae	Phytolacca acinosa Roxb.	Ren Shen	/	Roots	Herb	Dried	Nourishing	Decoct in water and take orally/Soak in wine and take orally	W-2022-0876
Brassicaceae	Raphanus raphanistrum subsp. sativus (L.) Domin	Luo Bo Zi	tsoη53lǝ31pǝ31	Seeds	Herb	Dried	Abdominal distension	Decoct in water and take orally/Apply externally	W-2022-0939
Punicaceae	Punica granatum L.	Shi Liu Ke	sǝ53pe53oη55pu31	Roots/ Fruit peel	Tree/	Dried	Diarrhea	Decoct in water and take orally	W-2022-0941
Lycopodiaceae	Lycopodium japonicum Thunb.	Shi Zi Cao	poη55soη55	Whole plants	Herb	Dried	Sciatica	Decoct in water and take orally/Stew and eat after boiling	W-2022-0863
Caryophyllaceae	Dianthus chinensis L.	Luo Yang Hua	/	Whole plants	Herb	Dried	Diuretic and clearing strangury/breaking blood and regulating menstruation	Decoct in water and take orally	W-2022-0917
Ebenaceae	Diospyros kaki L.f.	Shi Zi Tang	tsoη53moη53si33xua53	Stem	Tree	Dried	Burn	Apply externally	W-2022-0936
Dioscoreaceae	Dioscorea cirrhosa Lour.	Xue Dang Gui	mao55sa35pia53	Tuber	Liana	Dried	Traumatic hematoma	Pound and mix with aged wine and heat and wrap affected area	W-2022-0819
Polypodiaceae	Pyrrosia lingua (Thunb.) Farw.	Fei Dao Jian	ka53tu55tɕi31	Leaves	Fern	Dried/Shade-dried	Diuretic and clearing strangury/clearing lung and draining heat	Decoct in water and take orally	W-2022-0828
Guttiferae	Hypericum japonicum Thunb.	Dui Ye Cao	lu13tso55pε55	Whole plant	Herb	Dried	Hemorrhoids	Decoct in water and take orally	W-2022-0935
Araceae	Acorus calamus var. calamus	Pu Jian	ε53tɕi31poη55	Rhizomes	Herb	Dried	Water disease	Decoct in water and take orally	W-2022-0865
	Arisaema heterophyllum Blume	Lao She Bao Gu	i31lǝ53lu53	Tuber	Herb	Dried	Lymphatic tuberculosis	Decoct in water and take orally	W-2022-0934
	Acorus calamus var. calamus	Jian Cao	sǝ53pε53naη55taη31	Rhizomes	Herb	Dried	Infertility	Soak in wine and take orally	W-2022-0918
	Pinellia ternata (Thunb.) Makino	Ma Yu Guo	/	Tuber	Herb	Dried	snake and centipede bite/Cough	Decoct in water and take orally	W-2022-0930
	Sauromatum giganteum (Engl.) Cusimano & Hett.	Ban Jie Lan	mu53o53sə55pi55	Rhizomes	Herb	Fresh product/Dried	Lymphatic tuberculosis	Soak in wine and take orally	W-2022-0827
Celastraceae	Tripterygium wilfordii Hook. f.	Lei Gong Teng	/	Roots	Liana	Dried	Rheumatic numbness	Decoct in water and take orally	W-2022-0874
Araliaceae	Eleutherococcus nodiflorus (Dunn) S.Y.Hu	Wu Jia Pi	me31kǝ53xe55	Roots bark	Shrub	Dried	Back pain/joint pain	Decoct in water and take orally	W-2022-0919
Amaranthaceae	Achyranthes aspera L.	Daoi Gou Cao	pu31ku55nian31	Rhizomes	Herb	Dried	Yin deficiency	Decoct in water and take orally	W-2022-0864
	Celosia argentea L.	Ji Jiao Hua	kai55wε13xǝ33	Inflorescence	Herb	Dried	Abnormal leucorrhea	Decoct in water and take orally	W-2022-0931
	Achyranthes bidentata Blume	Bai Bei	/	Roots	Herb	Dried	Soreness of waist and knees	Decoct in water and take orally	W-2022-0920
Typhaceae	Typha angustifolia L.	Shui La Zhu	/	Pollen	Herb	Dried	Cooling blood and detoxifying	Decoct in water and take orally	W-2022-0873
Berberidaceae	Berberis sieboldii Miq.	Ci Huang Bai	ta31kǝ31nie55	Roots	Shrub	Dried	Indigestion/jaundice	Decoct in water and take orally	W-2022-0923
	Mahonia fortunei (Lindl.) Fedde	Ci Huang Qin	mu33tai33pu33tɕi55	Roots	Shrub	Fresh product/Dried	Eye disease	Decoct in water and wash eyes	W-2022-0932
	Dysosma versipellis (Hance) M.Cheng ex T.S.Ying	Du Jiao Lian	ʑao31pi35kao53	Rhizomes	Herb	Fresh product/Dried	Traumatic injury	Soak in wine and take orally	W-2022-0826
	Epimedium brevicornu Maxim.	San Cha Gu	/	Leaves	Herb	Dried/Shade-dried	Impotence	Decoct in water and take orally	W-2022-0933
Urticaceae	Boehmeria nivea Gaudich.	Jia Ma	kuo55nie53	Roots/Leaves	Herb	Dried	Nosebleed/metrorrhagia	Decoct in water and take orally/Apply externally	W-2022-0921
	Urtica fissa E.Pritz. ex Diels	He Ma	xuo55ma55pa55ɕi55	Roots	Herb	Dried	Rheumatic numbness/ Relieving spasm	Decoct in water and take orally	W-2022-0927
Commelinaceae	Commelina communis L.	Zhu Jie Cao	/	Whole plants	Herb	Fresh product	Clearing heat and detoxifying	Stir-fry	W-2022-0922
Melastomataceae	Fordiophyton faberi Stapf	Suan Gan	/	Rhizomes	Herb	Fresh product	Expelling wind and eliminating dampness	Decoct in water and take orally	W-2022-0825
Botrychiaceae	Botrychium ternatum (Thunb.) Sw.	She Bu Jian	si53tu53na55	Whole plants	Fern	Dried	Dry burn disease	Decoct in water and take orally	W-2022-0926
Ginkgoaceae	Ginkgo biloba L.	Bai Guo	pia55wu33tsε55	Kernel	Tree	Dried	Male sexual dysfunction	Decoct in water and take orally/Stew and eat after boiling	W-2022-0820
Iridaceae	Iris domestica (L.) Goldblatt & Mabb.	Bian Zhu	ta55poη55moη53mo53	Rhizomes	Herb	Dried	Traumatic bleeding	Crush and squeeze juice and apply externally	W-2022-0928
Polygalaceae	Polygala tenuifolia Willd.	Jing Feng Cao	xə55kuo55tsǝ31pe31	Whole plants	Herb	Dried	Converging heart spirit/warming and tonifying heart/Yang deficiency/sedating and calming mind spirit	Decoct in water and take orally	W-2022-0867
Rutaceae	Citrus medica L.	Fo Shou Gan	/	Fruits	Tree	Dried	Lymph node enlargement	Pound and mix with aged wine and heat and wrap affected area	W-2022-0872
	Zanthoxylum bungeanum Maxim.	Chuan Jiao	tɕi35	Fruits	Tree	Dried	Stomach pain	Decoct in water and take orally	W-2022-0987
	Platycladus orientalis (L.) Franco	Huang Bo	pe53wu55	Bark	Tree	Dried	Tongue disease	Hammer and hold in mouth	W-2022-0866
	Zanthoxylum bungeanum Maxim.	Ye Sheng Hua Jiao Gen	tɕi35	Roots	Tree	Dried	Eczema/scabies	Decoct in water and take orally	W-2022-0925
	Tetradium ruticarpum (A.Juss.) T.G.Hartley	Wu Zhu Yu	/	Fruits	Tree	Dried	Headache	Decoct in water and take orally	W-2022-0870
	Orixa japonica Thunb.	Chou Shan Yang	/	Roots	Shrub	Dried	Clearing heat and releasing exterior	Decoct in water and take orally	W-2022-0821
Lauraceae	Litsea pungens Hemsl.	Shan Hu Jiao	mu13tai33ɕi33ηi55	Roots	Tree	Dried	Esophagitis	Decoct in water and take orally	W-2022-0924
	Camphora septentrionalis (Hand.-Mazz.) Y.Yang, Bing Liu & Zhi Yang	Fang Zhang	wu53tai53xaη53	Roots	Tree	Dried	Paralysis/body odor	Apply externally	W-2022-0824
	Cinnamomum cassia (L.) J.Presl	Rou Gui	/	Stem	Tree	Dried	Cold	Decoct in water and take orally	W-2022-0871
	Litsea coreana var. lanuginosa (Migo) Yen C.Yang & P.H.Huang	Lao Ying Cha	/	Bud	Tree	Dried	Relieving summer heat	Decoct in water and take orally.	W-2022-0869
Myrsinaceae	Ardisia crenata Sims/Ardisia crispa (Thunb.) A. DC.	Ba Zhua Jin Long	ʑao31mo55koη53ni55	Roots	Shrub	Dried/Shade-dried	Sore throat	Hammer and hold in mouth	W-2022-0822
Nyctaginaceae	Mirabilis jalapa L.	Di Lao Shu	u53ke55ke55xε53	Roots	Herb	Dried	Hot strangury/turbid discharge	Decoct in water and take orally	W-2022-0823
Palmae	Trachycarpus fortunei (Hook.) H. Wendl.	Shan Zong	ti31ɕi35ton53lu53	Pith	Tree	Dried	Metrorrhagia	Decoct in water and take orally	W-2022-0868
